# Supplementary material
Source: ML conference proceedings conference paper supplement (https://proceedings.mlr.press/v70/mroueh17a.html)
Supplement: Supplementary file 1 [file mroueh17a-supp.pdf]

Supplementary Material for McGan: Mean and Covariance Feature Matching GAN

Youssef Mroueh <sup>\*1 2</sup> Tom Sercu <sup>\*1 2</sup> Vaibhava Goel <sup>2</sup>

**A. Subspace Matching Interpretation of Covariance Matching GAN**

Let  $\Delta_\omega = \Sigma_\omega(\mathbb{P}) - \Sigma_\omega(\mathbb{Q})$ .  $\Delta_\omega$  is a symmetric matrix but not PSD, which has the property that its eigenvalues  $\lambda_j$  are related to its singular values as given by:  $\sigma_j = |\lambda_j|$  and its left and right singular vectors coincides with its eigenvectors and satisfy the following equality  $u_j = \text{sign}(\lambda_j)v_j$ . One can ask here if we can avoid having both  $U, V$  in the definition of  $\text{IPM}_\Sigma$  since at the optimum  $u_j = \pm v_j$ . One could consider  $\delta E_\omega(\mathbb{P}_r, \mathbb{P}_\theta)$  defined as follows:

$$\max_{\omega \in \Omega, U \in \mathcal{O}_{m,k}} \underbrace{\mathbb{E}_{x \sim \mathbb{P}_r} \|U\Phi_\omega(x)\|^2}_{\text{Energy in the subspace of real data}} - \underbrace{\mathbb{E}_{z \sim \mathbb{P}_\theta} \|U\Phi_\omega(g_\theta(z))\|^2}_{\text{Energy in the subspace of fake data}},$$

and then solve for  $\min_{g_\theta} \delta E_\omega(\mathbb{P}_r, \mathbb{P}_\theta)$ . Note that:

$$\begin{aligned} \delta E_\omega(\mathbb{P}_r, \mathbb{P}_\theta) &= \max_{\omega \in \Omega, U \in \mathcal{O}_{m,k}} \text{Trace}(U^\top (\Sigma_\omega(\mathbb{P}_r) - \Sigma_\omega(\mathbb{P}_\theta))U) \\ &= \max_{\omega \in \Omega} \sum_{i=1}^k \lambda_i(\Delta_\omega) \end{aligned}$$

$\delta E_\omega$  is not symmetric furthermore the sum of those eigenvalues is not guaranteed to be positive and hence  $\delta E_\omega$  is not guaranteed to be non negative, and hence does not define an IPM. Noting that  $\sigma_i(\Delta_\omega) = |\lambda_i(\Delta_\omega)|$ , we have that:

$$\text{IPM}_\Sigma(\mathbb{P}_r, \mathbb{P}_\theta) = \sum_{i=1}^k \sigma_i(\Delta_\omega) \geq \sum_{i=1}^k \lambda_i(\Delta_\omega) = \delta E_\omega(\mathbb{P}_r, \mathbb{P}_\theta).$$

Hence  $\delta E$  is not an IPM but can be optimized as a lower bound of the  $\text{IPM}_\Sigma$ . This would have an energy interpretation as in the energy based GAN introduced recently (Zhao et al., 2017): the discriminator defines a subspace that has higher energy on real data than fake data, and the generator maximizes his energy in this subspace.

**B. Mean and Covariance Matching Loss Combinations**

We report below samples for McGan, with different  $\text{IPM}_{\mu,q}$  and  $\text{IPM}_\Sigma$  combinations. All results are reported for the same architecture choice for generator and discriminator, which produced qualitatively good samples with  $\text{IPM}_\Sigma$  (Same one reported in Section 6 in the main paper). Note that in Figure 7 with the same hyper-parameters and architecture choice, WGAN failed to produce good sample. In other configurations training converged.

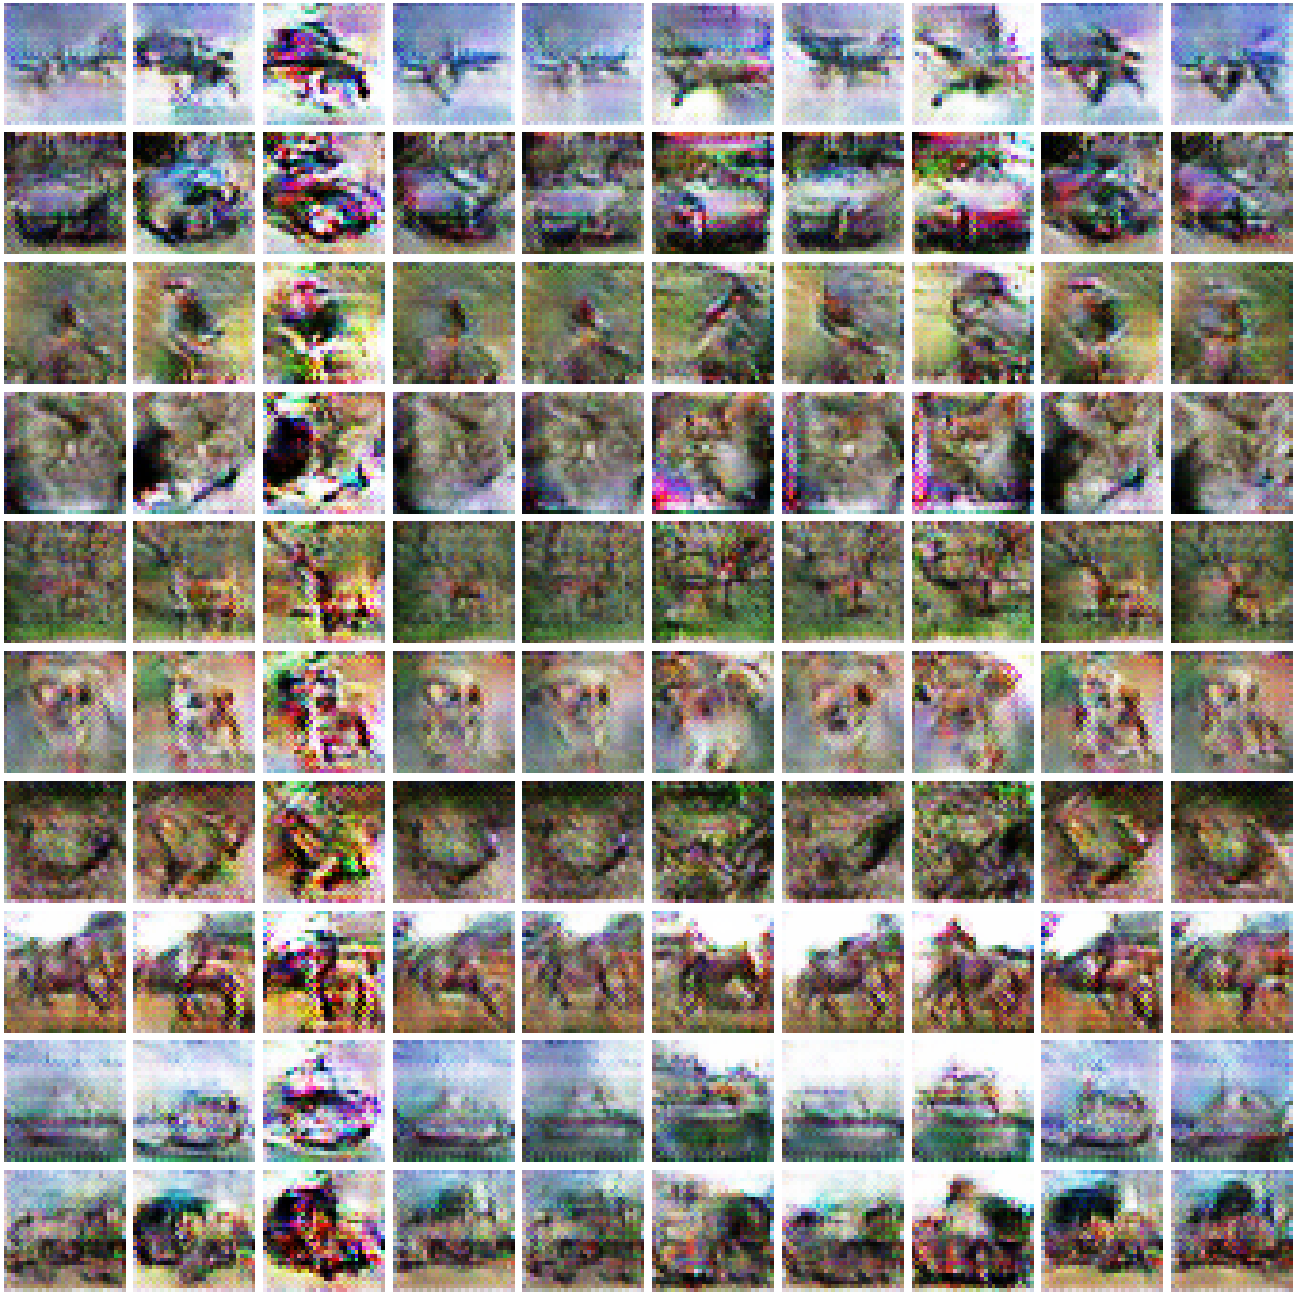

Figure 7. Cifar-10: Class-conditioned generated samples with  $IPM_{\mu,1}$ (WGAN). Within each column, the random noise  $z$  is shared, while within the rows the GAN is conditioned on the same class: from top to bottom *airplane*, *automobile*, *bird*, *cat*, *deer*, *dog*, *frog*, *horse*, *ship*, *truck*.

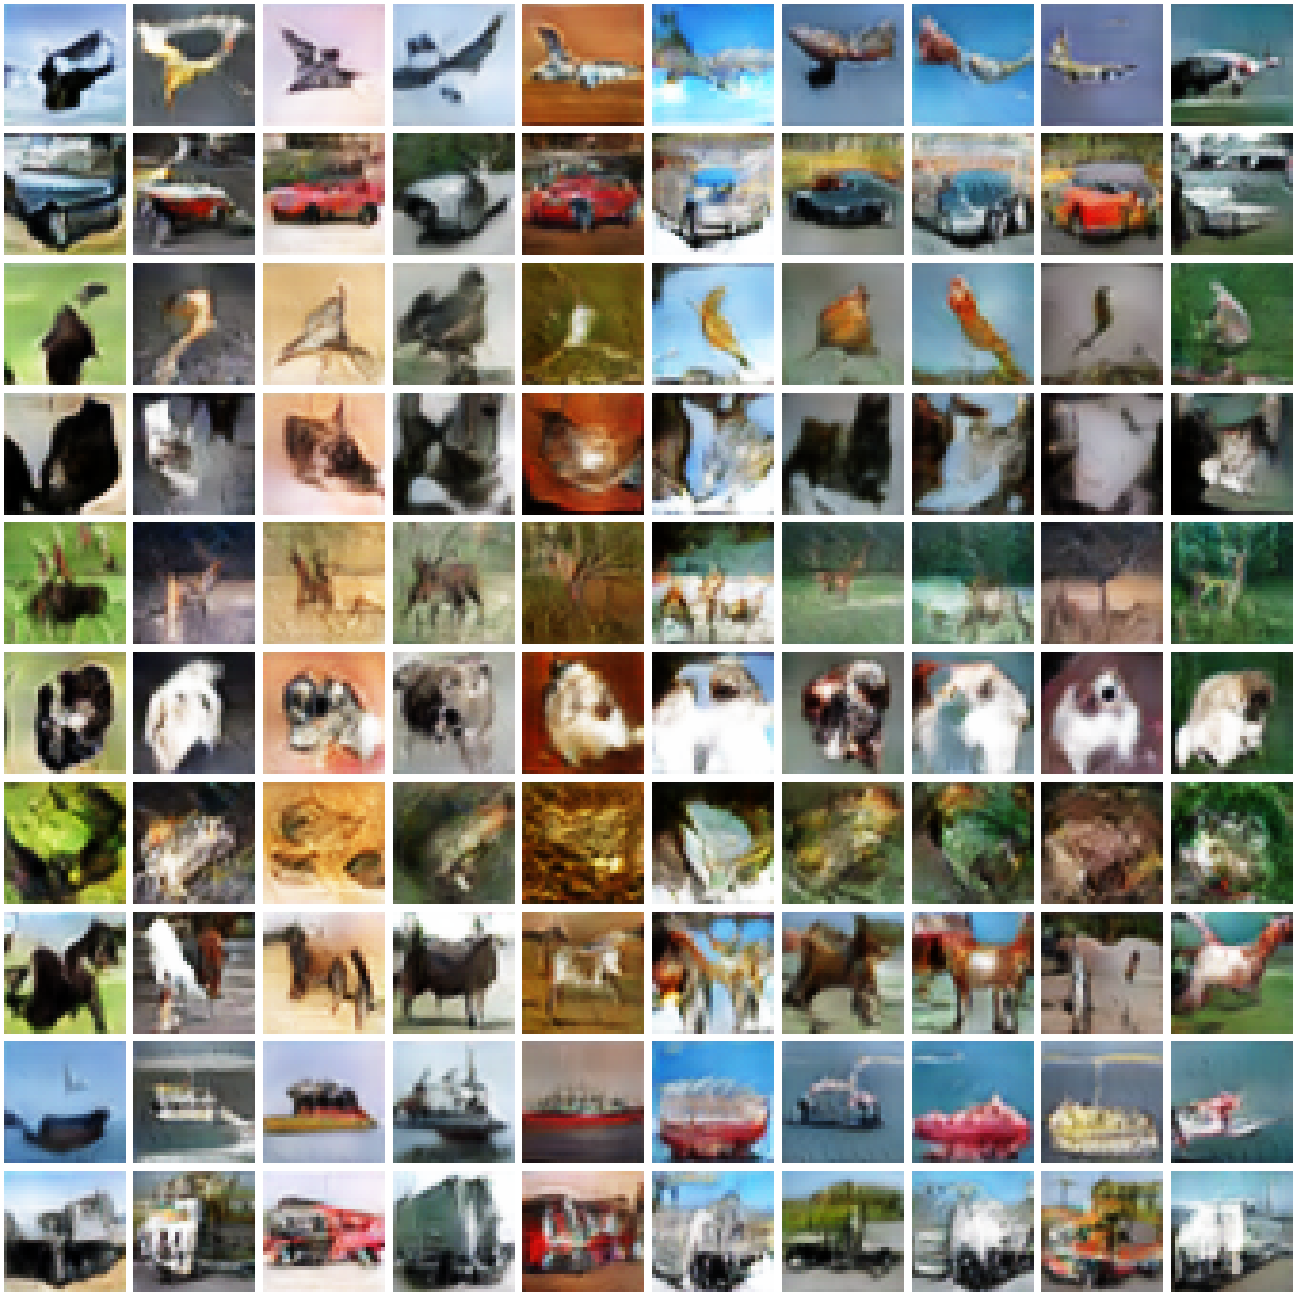

Figure 8. Cifar-10: Class-conditioned generated samples with  $IPM_{\mu,2}$ . Within each column, the random noise  $z$  is shared, while within the rows the GAN is conditioned on the same class: from top to bottom *airplane*, *automobile*, *bird*, *cat*, *deer*, *dog*, *frog*, *horse*, *ship*, *truck*.

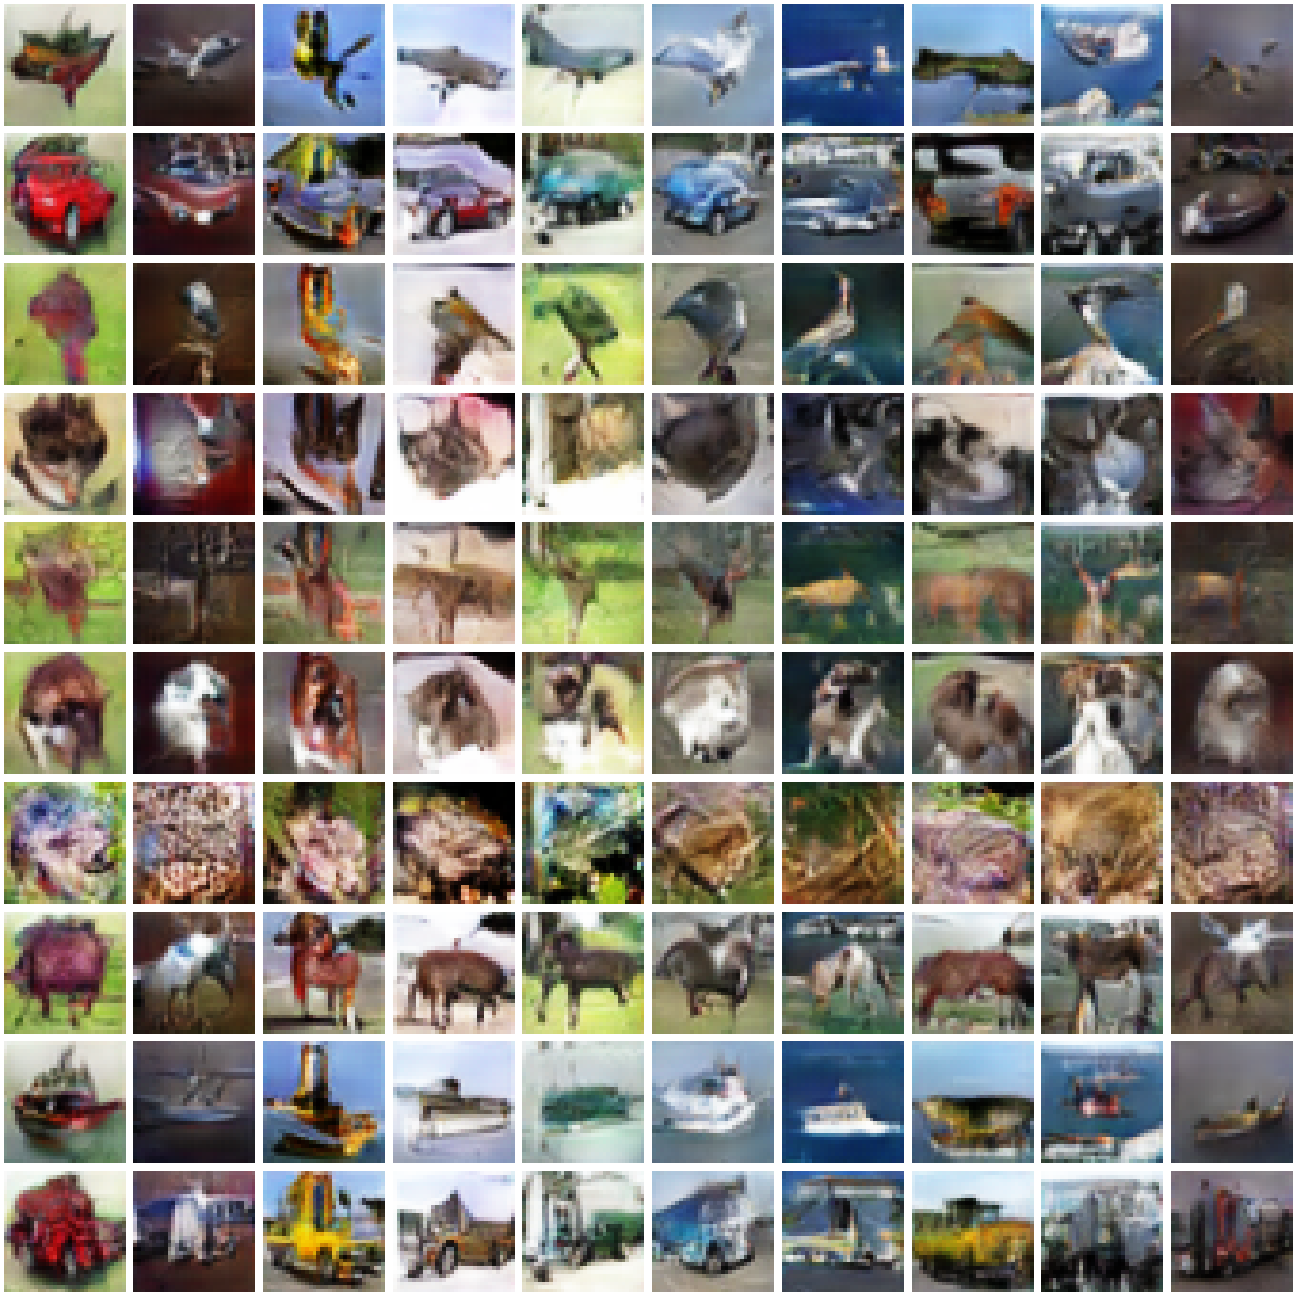

Figure 9. Cifar-10: Class-conditioned generated samples with  $IPM_{\Sigma}$ . Within each column, the random noise  $z$  is shared, while within the rows the GAN is conditioned on the same class: from top to bottom *airplane*, *automobile*, *bird*, *cat*, *deer*, *dog*, *frog*, *horse*, *ship*, *truck*.

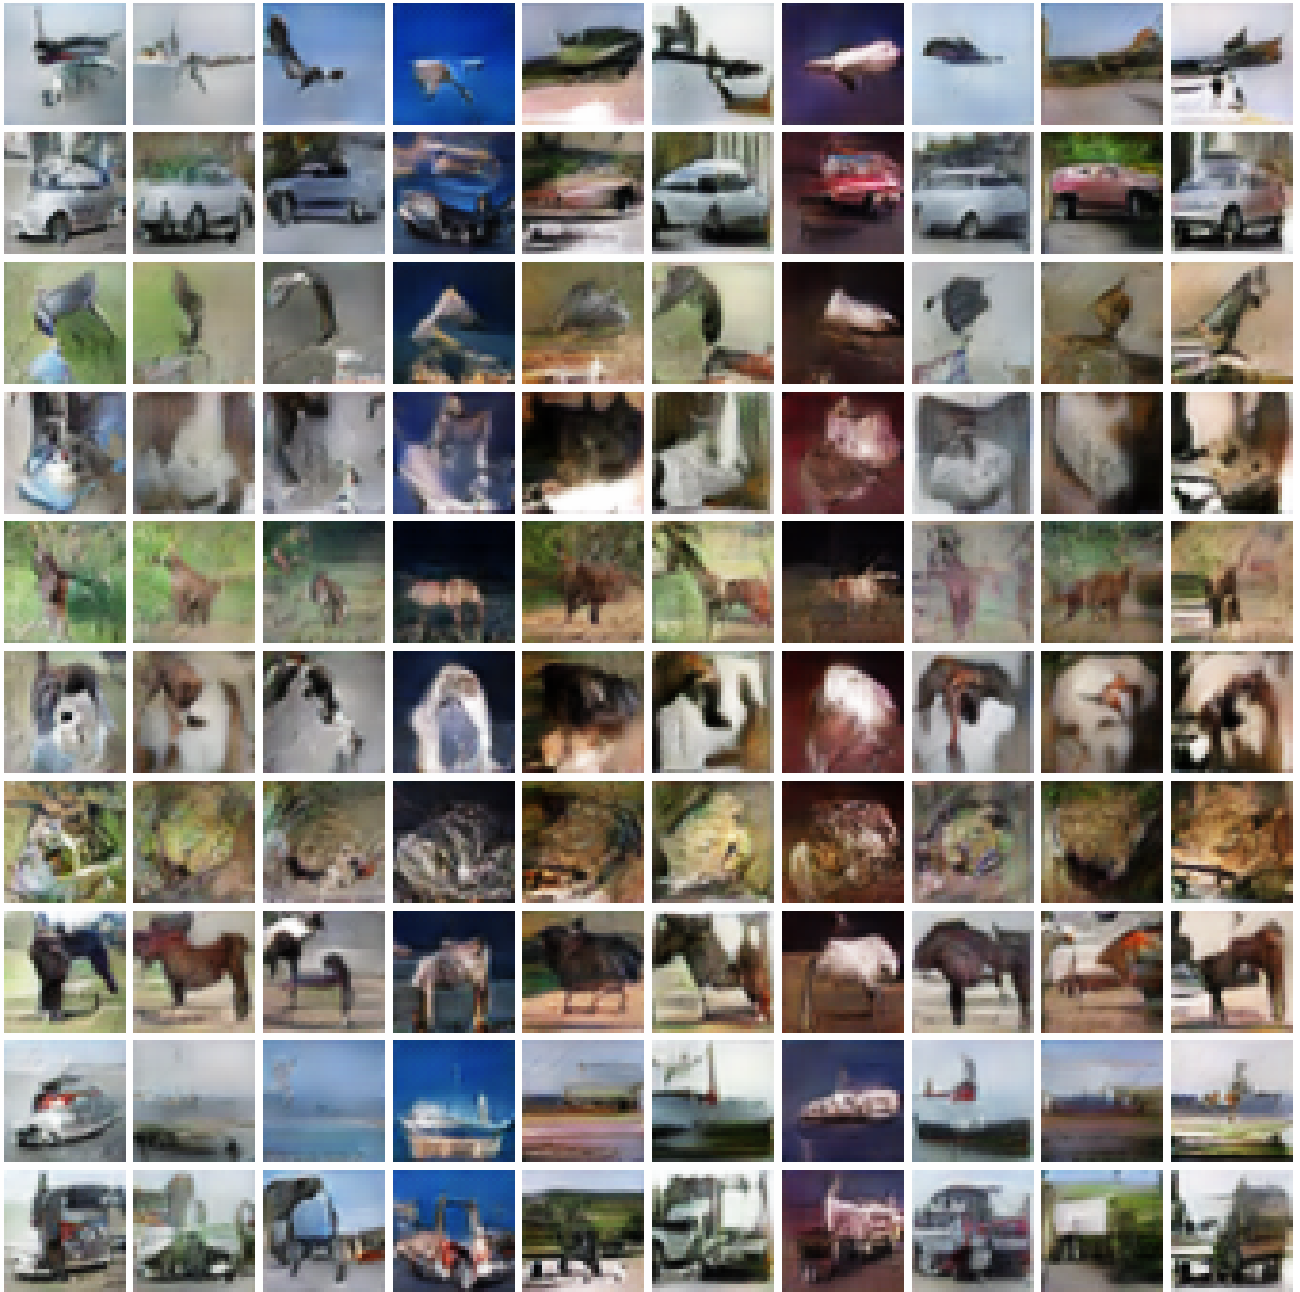

Figure 10. Cifar-10: Class-conditioned generated samples with  $\text{IPM}_{\mu,1} + \text{IPM}_{\Sigma}$ . Within each column, the random noise  $z$  is shared, while within the rows the GAN is conditioned on the same class: from top to bottom *airplane*, *automobile*, *bird*, *cat*, *deer*, *dog*, *frog*, *horse*, *ship*, *truck*.

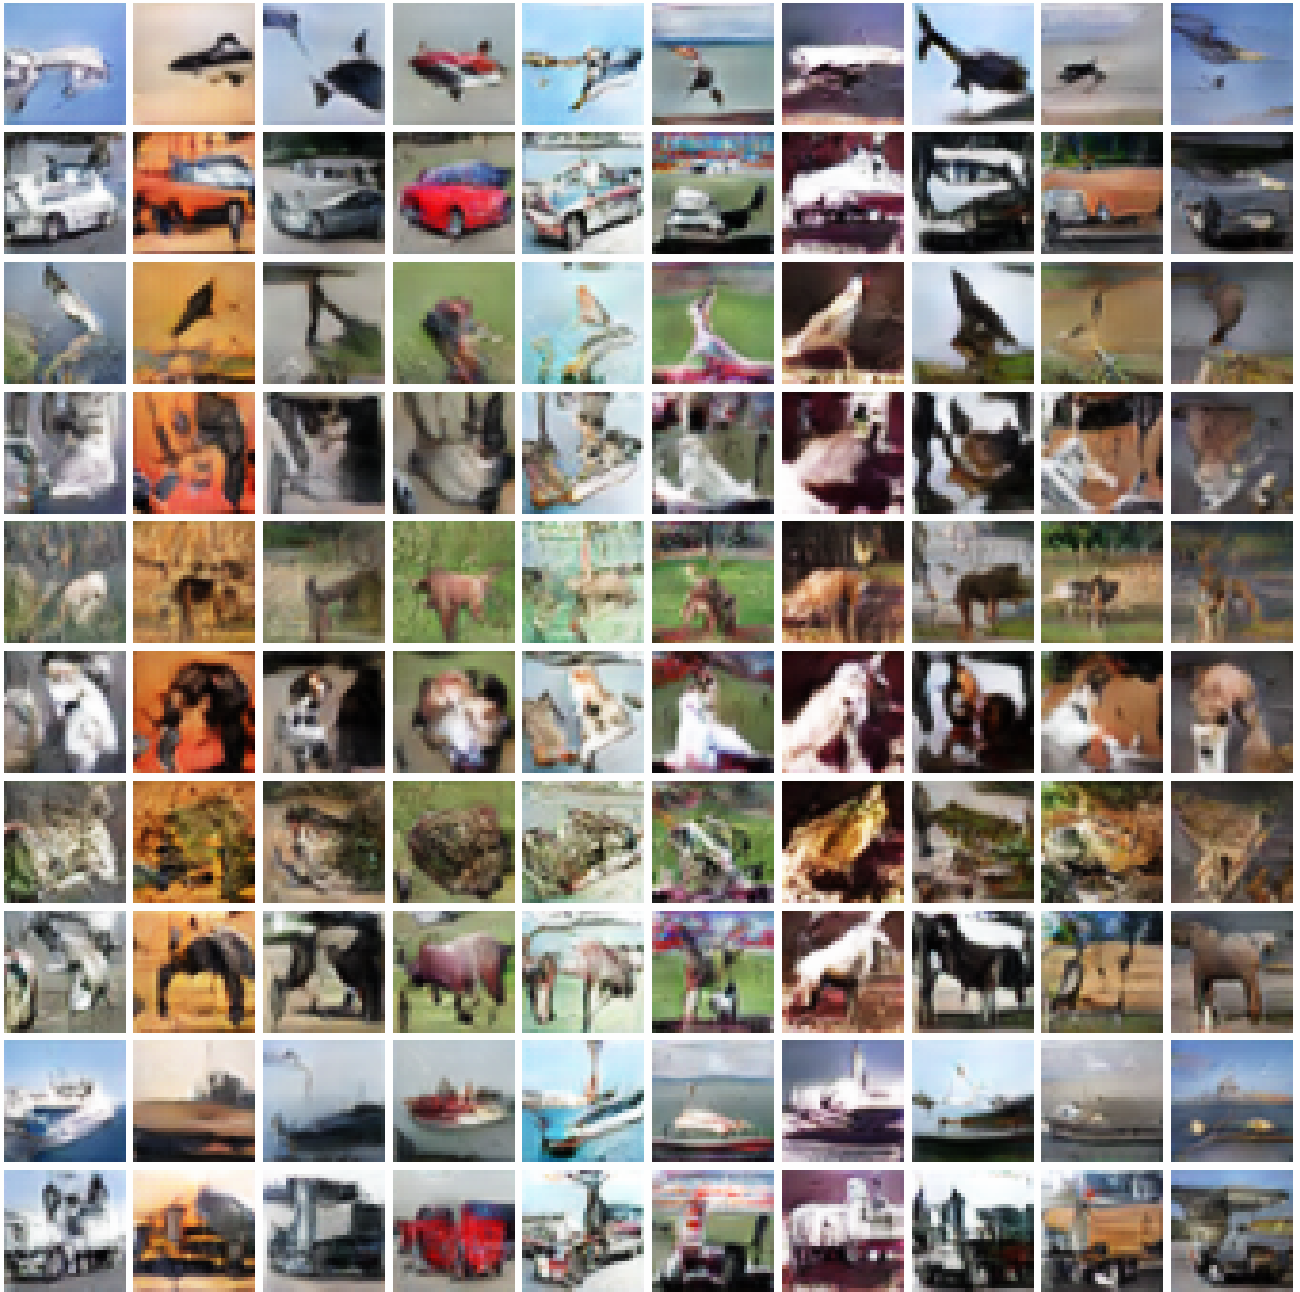

Figure 11. Cifar-10: Class-conditioned generated samples with  $IPM_{\mu,2} + IPM_{\Sigma}$ . Within each column, the random noise  $z$  is shared, while within the rows the GAN is conditioned on the same class: from top to bottom *airplane*, *automobile*, *bird*, *cat*, *deer*, *dog*, *frog*, *horse*, *ship*, *truck*.
